# Supplementary material for: Protein and calorie restriction may improve outcomes in living kidney donors and kidney transplant recipients
Source: publisher site journal article supplement (doi:10.18632/aging.103619), 2020-07-11
Supplement: Supplementary file [file aging-v12i13-103619-supplementary-material-SD2.pdf]

## SUPPLEMENTARY TABLES

**Supplementary Table 1. Perioperative outcome of donors and recipients.**

| <b>A. Donors</b>                         |                   |                       |                |
|------------------------------------------|-------------------|-----------------------|----------------|
| <b>Parameter</b>                         | <b>PCR (n=15)</b> | <b>Control (n=20)</b> | <b>P-value</b> |
| Duration of surgery (HH:MM)              | 03:29 ± 00:10     | 03:53 ± 00:10         | 0.11           |
| Start surgery (HH:MM)                    | 08:11 ± 00:05     | 08:18 ± 00:07         | 0.43           |
| Blood loss (milliliters)                 | 47 ± 17           | 82 ± 24               | 0.24           |
| Duration warm ischemia time 1 (MM:SS))   | 03:20 ± 00:18     | 03:23 ± 00:17         | 0.90           |
| Duration cold ischemia time (HH:MM)      | 02:37 ± 00:10     | 02:45 ± 00:12         | 0.65           |
| Duration of warm ischemia time 2 (MM:SS) | 18:47 ± 01:12     | 20:00 ± 00:48         | 0.45           |
| Complications during surgery (yes/no)    | 1/15              | 0/20                  | 0.33           |
| <b>B. Recipients</b>                     |                   |                       |                |
| <b>Parameter</b>                         | <b>PCR (n=15)</b> | <b>Control (n=20)</b> | <b>P-value</b> |
| Duration of surgery (HH:MM)              | 03:08 ± 00:11     | 03:06 ± 00:13         | 0.92           |
| Start of surgery (HH:MM)                 | 11:54 ± 00:13     | 12:18 ± 00:10         | 0.17           |
| Time of kidney perfusion (HH:MM)         | 13:41 ± 00:16     | 14:06 ± 00:15         | 0.31           |
| Time of biopsy (HH:MM)                   | 13:20 ± 00:17     | 13:28 ± 00:11         | 0.77           |
| Blood loss (milliliters)                 | 180 ± 30          | 231 ± 41              | 0.33           |
| Urine production during surgery (yes/no) | 1/15              | 5/20                  | 0.14           |
| Complications during surgery (yes/no)    | 1/15              | 0/20                  | 0.33           |

Parameters are depicted as mean ± standard error of the mean. PCR = protein and caloric dietary restriction. HH:MM = hours:minutes. MM:SS = minutes:seconds. P-value < 0.05 is considered significant.

Supplementary Table 2. Random intercept mixed-effects differences, standard errors (Std. Error) and *P*-values for kidney function outcome of the living kidney donors and their kidney transplant recipients.

A. Living kidney donors

| Absolute values |                     |            |                 |                       |            |                 |
|-----------------|---------------------|------------|-----------------|-----------------------|------------|-----------------|
| Time point      | Creatinine (μmol/L) |            |                 | CKD-EPI eGFR (mL/min) |            |                 |
|                 | Difference          | Std. Error | <i>P</i> -value | Difference            | Std. Error | <i>P</i> -value |
| POD-pre         | - 1,83              | 6,09       | 0,765           | - 6,68                | 3,66       | 0,074           |
| POD1            | - 6,57              | 6,09       | 0,286           | - 2,82                | 3,66       | 0,445           |
| POD2            | - 14,02             | 6,13       | <b>0,027</b>    | + 0,38                | 3,67       | 0,918           |
| POD3            | - 15,35             | 6,29       | <b>0,018</b>    | + 1,22                | 3,78       | 0,748           |
| POMo1           | - 14,52             | 6,19       | <b>0,023</b>    | + 1,73                | 3,70       | 0,643           |
| POMo3           | - 10,23             | 6,13       | 0,102           | - 1,42                | 3,68       | 0,701           |

| Relative values |                         |            |                 |
|-----------------|-------------------------|------------|-----------------|
| Time point      | Relative creatinine (%) |            |                 |
|                 | Difference              | Std. Error | <i>P</i> -value |
| POD1            | - 4,38                  | 72,44      | 0,399           |
| POD2            | - 13,95                 | 76,15      | <b>0,010</b>    |
| POD3            | - 15,53                 | 88,28      | <b>0,006</b>    |
| POMo1           | - 14,35                 | 80,27      | <b>0,009</b>    |
| POMo3           | - 9,28                  | 77,61      | 0,084           |

B. Kidney transplant recipients

| Absolute values |                     |            |                 |                       |            |                 |
|-----------------|---------------------|------------|-----------------|-----------------------|------------|-----------------|
| Time point      | Creatinine (μmol/L) |            |                 | CKD-EPI eGFR (mL/min) |            |                 |
|                 | Difference          | Std. Error | <i>P</i> -value | Difference            | Std. Error | <i>P</i> -value |
| POD-pre         | - 23,43             | 85,23      | 0,784           | - 1,15                | 5,969      | 0,848           |
| POD1            | - 161,60            | 85,23      | 0,062           | + 1,10                | 5,969      | 0,854           |
| POD2            | - 188,02            | 85,23      | <b>0,031</b>    | + 2,37                | 5,969      | 0,693           |
| POD3            | - 199,73            | 85,23      | <b>0,022</b>    | + 6,50                | 5,969      | 0,280           |
| POD4            | - 202,02            | 85,23      | <b>0,021</b>    | + 8,82                | 5,969      | 0,144           |
| POD5            | - 185,74            | 85,60      | <b>0,033</b>    | + 11,28               | 5,969      | 0,063           |
| POD6            | - 140,75            | 85,23      | 0,103           | + 7,46                | 5,995      | 0,218           |
| POD7            | - 142,53            | 85,62      | 0,100           | + 5,98                | 5,996      | 0,322           |
| POD14           | - 84,16             | 86,04      | 0,331           | + 7,94                | 6,027      | 0,192           |
| POD21           | - 52,44             | 86,50      | 0,546           | + 3,46                | 6,027      | 0,568           |
| POMo1           | - 59,44             | 86,50      | 0,494           | + 8,44                | 6,027      | 0,166           |
| POMo2           | - 50,75             | 86,50      | 0,559           | + 7,16                | 6,027      | 0,239           |
| POMo3           | - 50,74             | 86,50      | 0,559           | + 5,05                | 6,027      | 0,405           |
| POMo6           | - 53,36             | 86,04      | 0,537           | + 2,85                | 6,027      | 0,638           |

|            |           | Relative values         |            |              |
|------------|-----------|-------------------------|------------|--------------|
| Time point | Parameter | Relative creatinine (%) |            |              |
|            |           | Difference              | Std. Error | P-value      |
|            | POD1      | - 21,82                 | 10,46      | <b>0,040</b> |
|            | POD2      | - 28,63                 | 10,46      | <b>0,007</b> |
|            | POD3      | - 28,82                 | 10,46      | <b>0,007</b> |
|            | POD4      | - 28,47                 | 10,46      | <b>0,008</b> |
|            | POD5      | - 21,33                 | 10,46      | <b>0,044</b> |
|            | POD6      | - 15,90                 | 10,46      | 0,132        |
|            | POD7      | - 16,71                 | 10,52      | 0,116        |
|            | POD14     | - 12,13                 | 10,59      | 0,255        |
|            | POD21     | - 8,50                  | 10,67      | 0,428        |
|            | POMo1     | - 9,94                  | 10,67      | 0,354        |
|            | POMo2     | - 9,52                  | 10,67      | 0,374        |
|            | POMo3     | - 9,20                  | 10,67      | 0,391        |
|            | POMo6     | - 6,10                  | 10,67      | 0,569        |

CKD-EPI eGFR = Chronic Kidney Disease Epidemiology Collaboration estimated Glomerular Filtration Rate. Differences are based on the outcomes of the CCPR group *versus* the control group. Relative values are set with POD-pre as baseline value, and therefore this time point was not included in the analysis of the relative differences. Significant *P*-values are depicted in bold.

**Supplementary Table 3. Baseline characteristics of living kidney donors included in the transcriptome analysis.**

| Parameter                        | PCR (n=10)       | Control (n=10)   | P-value |
|----------------------------------|------------------|------------------|---------|
| Age (years)                      | 59 (53-61)       | 51 (44-64)       | 0.19    |
| Gender (Male/Female)             | 3/7              | 5/5              | 0.39    |
| BMI (kg/m <sup>2</sup> )         | 25.6 (23.3-28.0) | 25.4 (23.4-26.0) | 0.59    |
| Systolic blood pressure (mm/Hg)  | 130 (124-136)    | 128 (124-136)    | 0.89    |
| Creatinine (mmol/L)              | 74 (68-82)       | 78 (71-90)       | 0.15    |
| eGFR (mL/min)                    | 83 (66-90)       | 75 (72-83)       | 0.68    |
| Urea (mmol/L)                    | 5.2 (4.8-5.6)    | 5.2 (4.0-5.4)    | 0.46    |
| Glucose (mmol/L)                 | 5.3 (5.1-5.7)    | 5.1 (4.8-5.8)    | 0.56    |
| Albumin (g/L)                    | 47 (45-48)       | 45 (45-47)       | 0.85    |
| Triglycerides (mmol/L)           | 1.2 (0.9-1.8)    | 1.3 (1.2-1.5)    | 0.62    |
| Hemoglobin (mmol/L)              | 8.7 (8.4-9.1)    | 8.9 (8.6-9.2)    | 0.63    |
| Trombocytes (10 <sup>9</sup> /L) | 241 (222-302)    | 223 (206-289)    | 0.48    |
| CRP (mg/L)                       | 1.4 (1.0-2.0)    | 1.3 (0.8-2.4)    | 0.30    |
| Leukocytes (10 <sup>9</sup> /L)  | 6.5 (5.6-7.6)    | 5.9 (5.5-6.9)    | 1.00    |
| Bilirubin (μmol/L)               | 8.0 (5.3-10.0)   | 6.0 (5.0-7.3)    | 0.31    |
| Potassium (mmol/L)               | 4.5 (4.3-4.6)    | 4.4 (4.1-4.8)    | 0.86    |
| Type of donation (R/U/A)         | 3/1/6            | 1/6/3            | 0.79    |
| Side of nephrectomy (Left/Right) | 6/4              | 6/4              | 1.00    |
| Method used (Laparoscopic/HARP)  | 7/3              | 7/3              | 1.00    |

No significant differences (*P*<0.05) were seen in the baseline characteristics of both groups. BMI = body mass index; eGFR = estimated glomerular filtration rate using the CKD-EPI formula; CRP = C-reactive protein. Type of donation: R = related; U = unrelated; A = anonymous. HARP = hand-assisted retroperitoneal nephrectomy. PCR = protein and caloric dietary restriction.

**Supplementary Table 4. Pathway and upstream transcription factor analysis in renal tissue of male donors.**

| <b>Ingenuity Canonical Pathways</b>          | <b>Ratio</b>  | <b>Up/Down</b> | <b>P-value</b>        | <b>Z-score</b> |
|----------------------------------------------|---------------|----------------|-----------------------|----------------|
| Xenobiotic Metabolism Signaling              | 10/287 (3.5%) | 4/6            | 4.80 <sup>E</sup> -06 | N/A            |
| Antigen Presentation Pathway                 | 4/38 (10.5%)  | 1/3            | 5.83 <sup>E</sup> -05 | N/A            |
| Serotonin Degradation                        | 5/75 (6.7%)   | 0/5            | 6.23 <sup>E</sup> -05 | N/A            |
| LPS/IL-1-Mediated Inhibition of RXR Function | 7/221 (3.2%)  | 2/5            | 2.42 <sup>E</sup> -04 | N/A            |
| Nicotine Degradation II                      | 4/63 (6.3%)   | 1/3            | 4.23 <sup>E</sup> -04 | N/A            |
| Superpathway of Melatonin Degradation        | 4/68 (5.9%)   | 0/4            | 5.66 <sup>E</sup> -04 | N/A            |
| Allograft Rejection Signaling                | 4/84 (4.8%)   | 1/3            | 1.25 <sup>E</sup> -03 | N/A            |
| Thyroid Hormone Metabolism II                | 3/41 (7.3%)   | 0/3            | 1.54 <sup>E</sup> -03 | N/A            |
| OX40 Signaling Pathway                       | 4/91 (4.4%)   | 1/3            | 1.68 <sup>E</sup> -03 | N/A            |
| Autoimmune Thyroid Disease Signaling         | 3/47 (6.4%)   | 1/2            | 2.28 <sup>E</sup> -03 | N/A            |
| Graft-versus-Host Disease Signaling          | 3/48 (6.2%)   | 1/2            | 2.43 <sup>E</sup> -03 | N/A            |
| Phenylalanine Degradation IV                 | 2/14 (14.3%)  | 0/2            | 2.68 <sup>E</sup> -03 | N/A            |
| Nicotine Degradation III                     | 3/54 (5.6%)   | 0/3            | 3.40 <sup>E</sup> -03 | N/A            |
| Type I Diabetes Mellitus Signaling           | 4/111 (3.6%)  | 2/2            | 3.46 <sup>E</sup> -03 | N/A            |
| Melatonin Degradation I                      | 3/63 (4.8%)   | 0/3            | 5.25 <sup>E</sup> -03 | N/A            |

The top 15 overrepresented pathways derived from the differentially expressed transcripts (DET) in the protein and caloric dietary restriction (PCR) diet compared to the control group in kidney biopsies of male donors. The pathways show their corresponding ratio of regulated genes as percentage of total genes in the pathway, the P-value and the Z-score for predicted activation of inhibition of the pathways.

| <b>Upstream regulator</b> | <b>Description</b>                                                                                | <b>Z-score</b> | <b>P-value</b>             | <b>Gene log ratio</b> |
|---------------------------|---------------------------------------------------------------------------------------------------|----------------|----------------------------|-----------------------|
| <b>KLF4</b>               | Kruppel like factor 4                                                                             | <b>+2.198</b>  | <b>7.17<sup>E</sup>-04</b> | <b>-0.304</b>         |
| <b>NUPR1</b>              | Nuclear protein 1, transcription regulator                                                        | <b>+2.000</b>  | <b>3.39<sup>E</sup>-01</b> | <b>+0.081</b>         |
| RELA                      | RELA proto-oncogene, NF-κB subunit                                                                | +1.970         | 2.53 <sup>E</sup> -03      | -0.513                |
| KLF5                      | Kruppel like factor 5                                                                             | +1.957         | 2.78 <sup>E</sup> -04      | +0.803                |
| CCND1                     | Cyclin D1                                                                                         | +1.387         | 1.37 <sup>E</sup> -02      | +0.294                |
| JUN                       | Jun proto-oncogene, AP-1 transcription factor subunit                                             | +1.296         | 4.75 <sup>E</sup> -02      | -0.129                |
| HIF1A                     | Hypoxia inducible factor 1 alpha subunit                                                          | +1.250         | 5.40 <sup>E</sup> -04      | +0.763                |
| MYC                       | MYCN proto-oncogene, bHLH transcription factor                                                    | +1.224         | 1.97 <sup>E</sup> -04      | +0.537                |
| NOTCH1                    | Notch 1                                                                                           | +1.188         | 1.49 <sup>E</sup> -02      | +0.357                |
| TWIST1                    | Twist family bHLH transcription factor 1                                                          | +1.000         | 2.04 <sup>E</sup> -03      | -0.152                |
| TP73                      | Tumor protein 73                                                                                  | +0.639         | 7.73 <sup>E</sup> -04      | +0.170                |
| NKX2-3                    | NK2 homeobox 3                                                                                    | +0.447         | 9.09 <sup>E</sup> -03      | +0.039                |
| SMARCA4                   | SWI/SNF related, matrix associated, actin dependent regulator of chromatin, subfamily a, member 4 | +0.378         | 2.59 <sup>E</sup> -02      | -0.350                |
| NFKBIA                    | NFκB inhibitor alpha                                                                              | +0.295         | 4.07 <sup>E</sup> -03      | +0.163                |
| GATA3                     | GATA binding protein 3                                                                            | +0.152         | 3.62 <sup>E</sup> -02      | -0.181                |
| TP53                      | Tumor protein 53                                                                                  | +0.128         | 1.99 <sup>E</sup> -06      | -0.259                |
| TP63                      | Tumor protein 63                                                                                  | +0.101         | 7.14 <sup>E</sup> -03      | +0.116                |
| SP1                       | Sp1 transcription factor                                                                          | -0.063         | 1.50 <sup>E</sup> -03      | -0.240                |
| ATF3                      | Activating transcription factor 3                                                                 | -0.106         | 1.8e <sup>E</sup> -03      | -0.182                |
| NFE2L2                    | Nuclear factor, erythroid 2 like 2                                                                | -0.562         | 3.28 <sup>E</sup> -02      | +0.331                |
| CEBPA                     | CCAAT/enhancer binding protein alpha                                                              | -0.727         | 3.54 <sup>E</sup> -03      | +0.441                |
| MYCN                      | MYCN proto-oncogene, bHLH transcription factor                                                    | -0.923         | 2.36 <sup>E</sup> -02      | -0.030                |
| HMGA1                     | High mobility group AT-hook 1                                                                     | -1.000         | 1.13 <sup>E</sup> -02      | +0.945                |
| CREBBP                    | CREB binding protein                                                                              | -1.004         | 8.07 <sup>E</sup> -03      | +0.409                |
| KLF3                      | Kruppel like factor 3                                                                             | -1.134         | 3.35 <sup>E</sup> -03      | -0.302                |
| CEBPB                     | CCAAT/enhancer binding protein beta                                                               | -1.353         | 2.65 <sup>E</sup> -03      | -0.186                |
| <b>HNF4A</b>              | Hepatocyte nuclear factor 4 alpha                                                                 | <b>-3.331</b>  | <b>7.37<sup>E</sup>-04</b> | <b>-0.470</b>         |

Differentially regulated upstream transcription factors (TFs) derived from the DET in the protein and caloric dietary restriction (PCR) diet compared to the control group in kidney biopsies of male donors, with their corresponding Z-score and gene log ratio. Significantly activated or inhibited TFs are depicted in bold.

**Supplementary Table 5. Composition and energy content of the protein and caloric dietary restriction (PCR) diet.**

| <b>Diet</b>                            | <b>PCR diet</b> |
|----------------------------------------|-----------------|
| <b>Average content per 100 gram/mL</b> |                 |
| Energy (kcal)                          | 507             |
| (kJ)                                   | 2120            |
| Protein (g)                            | 4.98            |
| Protein (% of energy intake)           | 4.0             |
| Casein (g)                             | 4.3             |
| Whey protein (g)                       | 0.4             |
| Carbohydrates (g)                      | 67.0            |
| Carbohydrates (% of energy intake)     | 53.0            |
| Glucose (g)                            | 0.8             |
| Fructose (g)                           | 0.0             |
| Lactose (g)                            | 3.2             |
| Maltose (g)                            | 2.5             |
| Sucrose (g)                            | 14.0            |
| Polysaccharides (g)                    | 46.3            |
| Other (g)                              | 0.2             |
| Fat (g)                                | 24.5            |
| Fat (% of energy intake)               | 43              |
| Saturated fat (g)                      | 7.7             |
| Monounsaturated fat (g)                | 7.3             |
| Polyunsaturated fat (g)                | 9.4             |
| Linoleic acid (g)                      | 8.1             |
| A-linoleic acid (g)                    | 0.9             |
| Fibres                                 | 0.0             |
| Sodium (mg)                            | 128             |
| Potassium (mg)                         | 272             |
| Chloride (mg)                          | 163             |
| Calcium (mg)                           | 85              |
| Phosphor (mg)                          | 147             |
| Magnesium (mg)                         | 30              |
| Ferritin (mg)                          | 0.0             |
| Zinc (mg)                              | 0.0             |
| Copper (mg)                            | 0.0             |
| Manganic (mg)                          | 0.0             |
| Fluoride (mg)                          | 0.0             |
| Molybdenum (µg)                        | 0.0             |
| Selenium (µg)                          | 0.0             |
| Chrome (µg)                            | 0.0             |
| Iodine (µg)                            | 0.0             |
| Vitamin A (µg-RE)                      | 0.0             |
| Carotenoids (mg)                       | 0.0             |
| Vitamin D (µg)                         | 0.0             |
| Vitamin E (mg α-TE)                    | 0.0             |
| Vitamin K (µg)                         | 0.0             |
| Thiamin (mg)                           | 0.0             |
| Riboflavin (mg)                        | 0.0             |
| Niacin (mg NE)                         | 0.0             |
| Pantheenzuur (mg)                      | 0.0             |
| Vitamin B6 (mg)                        | 0.0             |
| Foliumzuur (µg)                        | 0.0             |
| B12 (µg)                               | 0.0             |
| Biotin (µg)                            | 0.0             |
| Vitamin C (mg)                         | 0.0             |
| Choline (mg)                           | 0.0             |

**Supplementary Table 6. Serum parameters measured in live kidney donors at various time points during the study.**

| <b>Parameter</b>                 | <b>Assay performed at</b> | <b>Time points of measurements</b>                                |
|----------------------------------|---------------------------|-------------------------------------------------------------------|
| Creatinine (mmol/L)              | Hospital laboratory       | Outpatient clinic, daily during hospital admission, POMo 1, 3 & 6 |
| eGFR (mL/min)                    | Hospital laboratory       | Outpatient clinic, daily during hospital admission, POMo 1, 3 & 6 |
| Urea (mmol/L)                    | Hospital laboratory       | Outpatient clinic, daily during hospital admission, POMo 3 & 6    |
| Glucose (mmol/L)                 | Hospital laboratory       | Outpatient clinic, daily during hospital admission, POMo 1, 3 & 6 |
| Albumin (g/L)                    | Hospital laboratory       | Outpatient clinic, daily during hospital admission, POMo 1, 3 & 6 |
| Triglycerides (mmol/L)           | Hospital laboratory       | Outpatient clinic, daily during hospital admission, POMo 1, 3 & 6 |
| Hemoglobin (mmol/L)              | Hospital laboratory       | Outpatient clinic, daily during hospital admission, POMo 1, 3 & 6 |
| Trombocytes ( $10^9/L$ )         | Hospital laboratory       | Outpatient clinic, daily during hospital admission, POMo 1, 3 & 6 |
| CRP (mg/L)                       | Hospital laboratory       | Outpatient clinic, daily during hospital admission                |
| Leukocytes ( $10^9/L$ )          | Hospital laboratory       | Outpatient clinic, daily during hospital admission, POMo 1, 3 & 6 |
| Bilirubin ( $\mu\text{mol/L}$ )  | Hospital laboratory       | Outpatient clinic, daily during hospital admission                |
| Potassium (mmol/L)               | Hospital laboratory       | Outpatient clinic, daily during hospital admission, POMo 1, 3 & 6 |
| Prealbumin (mg/L)                | Beckman                   | Outpatient clinic, peroperatively                                 |
| Retinol binding protein (mmol/L) | Diazyme                   | Outpatient clinic, peroperatively                                 |
| Leucine (mmol/L)                 | Nightingale               | Outpatient clinic, peroperatively, POD 1 & 2                      |
| Valine (mmol/L)                  | Nightingale               | Outpatient clinic, peroperatively, POD 1 & 2                      |
| Cystatin C (CYSC2)               | Roche® (Cobas 8000)       | Hospital admission, peroperatively, POD 1, 2 & 3 (if available)   |

eGFR = estimated glomerular filtration rate using the CKD-EPI formula; PoMo = postoperative month; POD = postoperative day; CRP = C-reactive protein.
